# Supplementary material
Source: HighWire-hosted journal article supplement (http://bmjleader.bmj.com/highwire/filestream/2384/field_highwire_adjunct_files/0/leader-2021-000495supp001_data_supplement.pdf)

**Appendix 1: Primary Query Impact (N = 19,650)**

|                     | <b>Count</b> | <b>% of sample</b> |
|---------------------|--------------|--------------------|
| MCC                 | 6,071        | 31                 |
| CC                  | 4,543        | 23                 |
| Principal Diagnosis | 2,444        | 12                 |
| None                | 1,566        | 8                  |
| Other               | 1,521        | 7.7                |
| Unassigned          | 1,246        | 6.3                |
| POA or HAC          | 892          | 4.5                |
| SOI                 | 888          | 4.5                |
| Procedure           | 213          | 1.1                |
| ROM                 | 183          | 0.9                |
| APR DRG             | 70           | 0.4                |
| I10 Concept         | 13           | < 0.1              |

*Primary Query Impact Categories:*

- Major Complications and Comorbidities (MCC)
- Complications and Comorbidities (CC)
- Principal Diagnosis – the condition, after study, which caused the admission to the hospital
- Present on Admission (POA)
- Hospital Acquired Conditions (HAC)
- Severity of Illness (SOI)
- Procedure - performed for definitive treatment rather than diagnostic or exploratory purposes or as a procedure necessitated by a complication.
- Risk of Mortality (ROM)
- All Patients Refined Diagnosis Related Groups (APR DRG) - Reference Group
- ICD10 coding system for disease and mortality documentation, developed by WHO (ICD10Concept)

## Appendix 2: Query Template Summary

To expedite the documentation query process, CDI nurses adapt and deploy pre-generated query templates associated with different types of queries. Hence, the query template variable allows us to capture the content of the compliance request.

| Characteristic                                            | N = 19,650 <sup>1</sup> |
|-----------------------------------------------------------|-------------------------|
| <b>Query Template</b>                                     |                         |
| Clarification of Clinical Findings                        | 17,107 (87)             |
| Heart Failure Specificity                                 | 364 (1.9)               |
| Malnutrition - Specificity of type                        | 345 (1.8)               |
| Documentation Clarification                               | 294 (1.5)               |
| Anemia Specificity                                        | 198 (1.0)               |
| Chronic Kidney Disease Specificity                        | 171 (0.9)               |
| Pressure Ulcer Specificity                                | 157 (0.8)               |
| Clarification of Diagnostic Findings                      | 110 (0.6)               |
| Nutritional Clarification                                 | 102 (0.5)               |
| Pneumonia Specificity                                     | 97 (0.5)                |
| Clinical Validity                                         | 89 (0.5)                |
| Debridement Specificity                                   | 86 (0.4)                |
| Cause and Effect Relationship                             | 76 (0.4)                |
| Pancytopenia Specificity                                  | 61 (0.3)                |
| POA Diagnosis Clarification                               | 55 (0.3)                |
| Clinical Significance                                     | 48 (0.2)                |
| Respiratory Failure Specificity                           | 46 (0.2)                |
| Rule Out Sepsis Clarification                             | 40 (0.2)                |
| Acuity Specificity                                        | 19 (<0.1)               |
| Acute Kidney Failure                                      | 19 (<0.1)               |
| Abbreviation Clarification                                | 17 (<0.1)               |
| Underlying Cause of SIRS Clarification                    | 17 (<0.1)               |
| Altered Mental Status Clarification                       | 16 (<0.1)               |
| Underlying Cause of Symptom Clarification                 | 15 (<0.1)               |
| Diabetes Mellitus Specificity                             | 11 (<0.1)               |
| Urosepsis Clarification                                   | 11 (<0.1)               |
| Shock Specificity                                         | 9 (<0.1)                |
| Condition Necessitating Admission                         | 8 (<0.1)                |
| Conflicting Documentation Clarification                   | 8 (<0.1)                |
| Medication - Correlation for Diagnosis                    | 7 (<0.1)                |
| Clarification of Clinical Diagnostic Findings Abbreviated | 6 (<0.1)                |
| Encephalopathy Specificity                                | 6 (<0.1)                |
| Bacteremia Clarification                                  | 5 (<0.1)                |
| Fracture Specificity                                      | 5 (<0.1)                |
| Procedural clarification                                  | 5 (<0.1)                |
| Rule Out Condition Clarification                          | 5 (<0.1)                |
| Depression specificity                                    | 2 (<0.1)                |
| HIV Clarification                                         | 2 (<0.1)                |
| Postoperative Relationship Clarification                  | 2 (<0.1)                |
| Pulmonary Embolism Specificity                            | 2 (<0.1)                |
| Skin Ulcer Specificity                                    | 2 (<0.1)                |
| Atrial fibrillation specificity                           | 1 (<0.1)                |
| Clinical Validity Abbreviated                             | 1 (<0.1)                |
| DVT Specificity                                           | 1 (<0.1)                |
| Kidney Failure Specificity                                | 1 (<0.1)                |
| Myocardial Infarction Specificity                         | 1 (<0.1)                |

<sup>1</sup>Statistics presented: n (%)

**Appendix 3: Rounding & Query Volume at a Community Hospital**

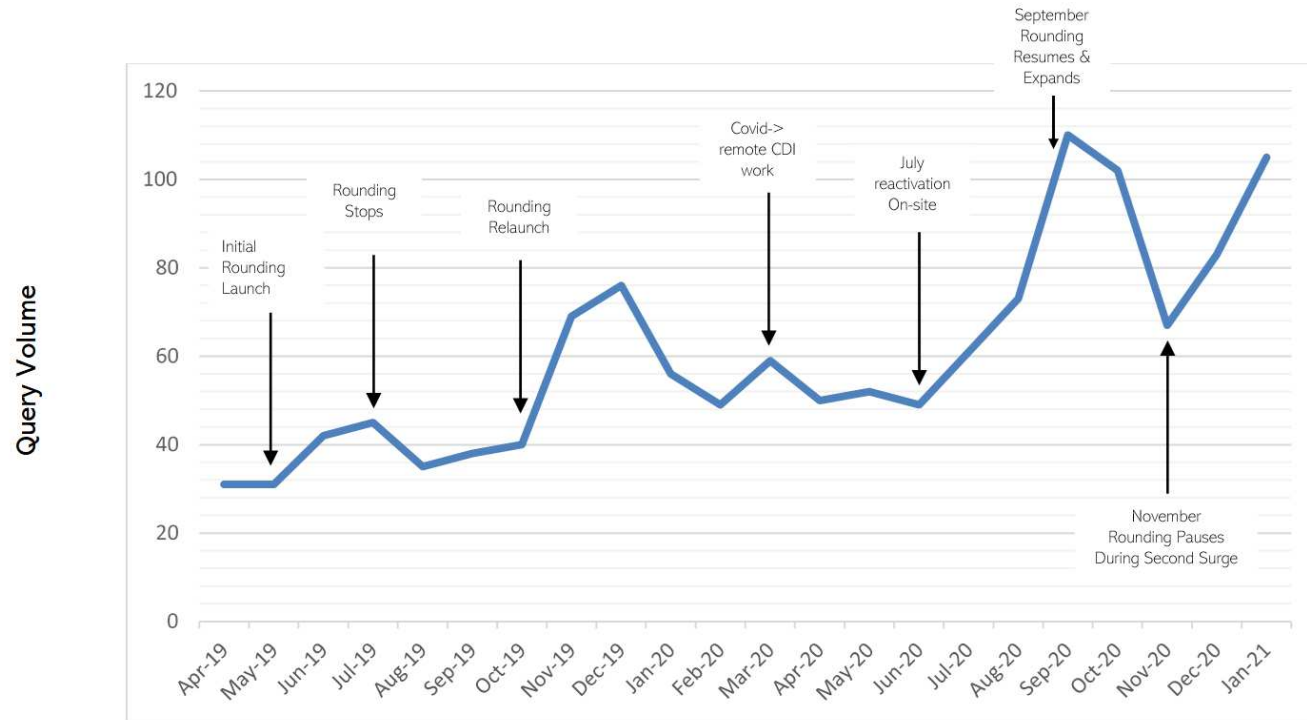

Supplement: leader-2021-000495supp001_data_supplement.pdf [file leader-2021-000495supp001_data_supplement.pdf]
